1 **Invasion of epithelial cells are correlated with secretion of Biosurfactant via the**  
2 **type 3 secretion system (SST3) of *Shigella flexneri***

3 **Duchel Jeanedvi Kinouani Kinavouidi<sup>1,2</sup>, Christian Aimé Kayath<sup>1,2</sup>, Etienne NGuimbi<sup>1,2</sup>**

4 1. Laboratoire de Biologie Cellulaire et Moléculaire (BCM), Faculté des Sciences et  
5 Techniques, Université Marien NGOUABI, BP. 69, Brazzaville, République du Congo

6 2. Institut national de Recherche en Sciences Exactes et Naturelles (IRSEN), Avenue de  
7 l'Auberge Gascogne, B.P 2400, Congo Brazzaville

8 Correspondence to: Christian Aimé Kayath, Avenue Gascogne, Cité Scientifique, Brazzaville,  
9 chriskayath@yahoo.fr

10 **Abstract**

11 Biosurfactants are amphipathic molecules produced by many microorganisms, usually bacteria,  
12 fungi and yeasts. They possess the property of reducing the tension of the membrane interfaces.  
13 No studies have been conducted on *Shigella* species showing their involvement of biosurfactant  
14 like molecules (BLM) in pathogenicity. This study aims to show that environmental and clinical  
15 strains of *Shigella* are able to produce BLM by emulsifying gasoline and diesel fuels. Our study  
16 has shown that BLM are secreted in the extracellular medium with EI24 ranging from 80 to  
17 100%. The secretion is depending on the type III secretion system (T3SS). We did show that *S.*  
18 *flexneri*, *S. boydii* and *S. sonnei* are able to interact with hydrophobic areas with respectively  
19 17.64%, 21.42% and 22.22% of hydrophobicity. 100 mM Benzoic and 1.5mg/mL Salicylic  
20 acids have been inhibited T3SS and this totally stops the BLM secretion. *Pseudomonas*  
21 *aeruginosa* which has T3SS is able to produce 100% of BLM in the presence or in the absence  
22 of both T3SS inhibitors. The secreted BLM is extractable with an organic solvent such as  
23 chloroform and could entirely be considered like lipopeptide or polypeptidic compound. By

24 secreting BLM, *Shigella* is able to perform multicellular phenomena like "swarming" allowing  
25 to invade and disseminate inside epithelial cells.

26 Keywords: *Shigella flexneri*, Biosurfactant, Lipopeptide, Dissemination, Pathogens

## 27 **Introduction**

28 The ingestion of pathogenic and virulent microorganisms generally affecting peoples in both  
29 developed and developing countries [1]. *Shigella* is one of the Gram-negative bacterium  
30 belonging to *Enterobacteriaceae* family and is causative agent of bacillary dysentery or  
31 shigellosis [2]. The genus *Shigella* was the major pathogen bacteria associated with dysentery  
32 with attributable fraction to 63,8%, but also the second most common pathogen associated with  
33 watery diarrhoea with attributable fraction to 12,9% in sub-Saharan Africa and south Asia.  
34 Children under 5 years are the most affected. More and more shigellosis is a pathology that  
35 both towards neglected diseases but 164300 of death per years have been notified all over the  
36 world in 2010. Most deaths occur in sub-Saharan Africa and in south Asia [3-6]. This is include  
37 Republic of Congo and surprisingly no epidemiological studies have been conducted in this  
38 field. The genus *Shigella* includes four species (*S. flexneri*, *S. sonnei*, *S. dysenteriae* and *S.*  
39 *boydii*) [7]. 10 bacteria of *S. dysenteriae* type 1 and 100 to 180 bacteria of *S. flexneri* or *S.*  
40 *sonnei* are enough to produce symptomatic infection [8].

41 *Shigella*'s pathogenicity is based on a virulence plasmid pWR100 in which the mxi-spa locus  
42 encodes the type three secretion system(T3SS) involved in effector production like IpaB, C and  
43 D (Translocator and Tip) to invade host cell [9-12]. A previous study in our laboratory that  
44 showed that *Shigella* sp. isolated from Brazzaville wastewater were able to emulsify  
45 hydrocarbon from gasoline and/or diesel fuel [13]. Sachin et al. found the same profile of  
46 hydrocrabon emulsification with *Shigella* strain [14]. According to amphipathic features,  
47 biosurfactants display a variety of surface activities, which explain their application in several  
48 fields related with emulsification, foaming, detergency, wetting, dispersion, pathogenicity and

49 solubilisation of hydrophobic compounds[15, 16]. Biosurfactants are produced from  
50 microorganisms like *Pseudomonas aeruginosa*, *Bacillus subtilis*, *Candida albicans*, and  
51 *Acinetobacter calcoaceticus*. Rhamnolipids, sophorolipids, mannosylerythritol lipids, surfactin,  
52 and emulsan are well known and documented in terms of biotechnological applications [16-  
53 18].

54 *Shigella* pathogenicity mechanisms have been mostly studied using *S. flexneri* M90T as a  
55 model. In this study, we need to demonstrate that *Shigella* strains produce a biosurfactant in  
56 extracellular medium. Inner and outer membrane encompass numbers of secretion systems. In  
57 this way, this work aims to study the involvement of BLM via the type three secretion system  
58 (T3SS) pathways. In addition this work will assess the approvals that *Shigella* could use the  
59 BLM to promote the invasion and the dissemination inside epithelial cells.

60

## 61 **Material and methods**

### 62 **Strains and Culture Conditions**

63 Four (4) *Shigella* strains were kindly provided and collected from laboratory of Molecular  
64 Bacteriology (Free University of Brussels). This is include *S. flexneri* M90T, *S. flexneri spa40-*,  
65 *S. sonnei* and *S. boydii*. Three (3) pure culture strains were isolated from patients in Brazzaville  
66 University and Hospital Center (CHU-B) in 2018. These were provided by the Bacteriology  
67 Laboratory this hospital. Thirty (30) *Shigella* sp. strains were isolated in environmental  
68 wastewater of Brazzaville using decimal dilution in SS medium. *P. aeruginosa* [19] and *E. coli*  
69 Top10 were used as controls in this study. The strains were spread on the plates containing LB  
70 medium with Congo red with 100 µg/mL streptomycin for 24 hours at 37 ° C for wild type and  
71 50 µg/mL for *spa40* mutant.

### 72 **Emulsification index (EI24) assay**

73

74 An overnight of 5mL of bacterial culture have been done. The emulsification index (EI24) was  
75 calculated as an indicator for BLM as previously demonstrated [13]. The medium was adjusted  
76 to pH 7.2 and supplemented with gasoline or diesel fuel (1 mL for 300 mL of medium). The  
77 EI24 was investigated by adding fuels with LB medium in 1:1 ratio (v/v). The solution was  
78 vortexed for 5 min and incubated for 24 h at 37°C. The emulsification rate was calculated  
79 through the height of the emulsion layer. In addition, EI24 was determined for gasoline and  
80 diesel fuel hydrocarbons. All the experiments were performed in triplicates, EI24 = height of  
81 emulsion layer/total height of solution  $\times$  100.

82

### 83 **Bacterial swarming assays.**

84 Swarming was studied for all *Shigella* strain used in this study. Using plate assays containing  
85 0.5% noble agar and LB medium with 0.5% dextrose. The mixture was sterilized at 121°C,  
86 during 15 min. After sterilization, the medium was supplemented with adequate antibiotics  
87 including streptomycin 100 $\mu$ g/mL for wild type and kanamycin 50  $\mu$ g/mL for the *Shigella*  
88 *flexneri* spa40 mutant. Approximately 6 h after pouring the plates, bacteria were inoculated and  
89 spread by using a sterilized platinum wire with log-phase cells ( [OD600] 0.6) grown in their  
90 respective media used for the swarming experiments. Swarming plates that were imaged only  
91 for their comparative end point swarming development were incubated at 30°C for 24 h prior  
92 to imaging [20].

### 93 **Bacterial Adhesion assay**

94 The adhesion of bacteria to hydrophobic surface was evaluated according to the method  
95 described by Rosenberg [21]. The hydrophobicity was evaluated according to the following  
96 formula  $\%H = (A_0 - A) / A_0 \times 100$  with  $A_0$ : OD before the mix; A: OD after vortexing of aqueous  
97 phase.

98

## 99 **Induction assay by using Congo Red**

100 *Shigella* sp. have been cultivated in 5 mL of the final volume. 1 mL of overnight culture was  
101 fuded and 500 µL of sterile PBS and 10 µl of Congo red (10 mg / ml) have been gently added  
102 and mixed with the pellet by avoiding to break cells. Samples were incubated at 37 ° C with  
103 stirring. After 30 minutes of incubation, samples were centrifuged at 15.000 rpm for 15 minutes  
104 [11] at room temperature. Supernatants were gently recovered and mixture with gasoline or  
105 diesel fuels. The emulsification Index (EI24) have been determined.

106

## 107 **Extraction of Biosurfactant like molecule**

108 Three methods have been used to extract biosurfactant.

109 *HCL and Ethanol precipitation*: This method was described by Vater [22]. An overnight culture  
110 has been centrifuged at 13,000 × g for 15 minutes. Once the supernatant was collected, HCl 1N  
111 and 90° ethanol were added to the supernatant. Precipitates have been generated by incubating  
112 samples at 4 ° C in overnight. Mixtures were fuded at 13000 g for 15 minutes to obtain granules.  
113 The granules obtained were tested with EI24 to evaluate the ability to emulsify the  
114 hydrocarbons.

115 *Ammonium sulfate precipitation test*: An overnight culture has been fuded at 13,000 rpm for 15  
116 minutes to separate supernatant and pellet. Then 15 mL of supernatant were mixed with  
117 ammonium sulfate (80%) for 15 minutes. And finally this has been incubated with shaking  
118 overnight. The mixture has been fuded at 6000 rpm for 30 minutes at room temperature. Pelet  
119 has been homogenized by using PBS buffer. The emulsification activity has been assessed.

120 *Biosurfactant Extraction using Chloroform*: The 24h culture was strictly centrifuged at 15,000  
121 g for 15 minutes to avoid any residual bacteria. One volume of supernatant was added with an  
122 equal volume of chloroform (v/v). The mixture was strongly agitated by a vortex. After  
123 centrifugation at 6000 rpm for 10 min, the non-aqueous phase is recovered. The solvent was

124 allowed to evaporate completely only without heating above 40°C. The residue is dissolved in  
125 a PBS buffer. The emulsification activity is tested by mixing with gasoline or diesel fuel in  
126 comparison with the supernatant at the start point. The emulsification Index (EI<sub>24</sub>) have been  
127 determined.

128

### 129 **Effect of Benzoic Acid and Salicylic acid on Biosurfactant secretion**

130 Viability of *Shigella* strains have been first evaluated with different concentration of benzoic  
131 acid and salicylic acid. *S. flexneri* M90T was grown in Luria-Bertani broth (LB) in the presence  
132 of various concentrations of benzoic acid (50 mM, 100 mM, 250 mM and 500mM) and salicylic  
133 acid (1.5 mg/mL, 3 mg/mL, 6.25 mg/mL and 12.5 mg/mL). After that, all *Shigella* strain was  
134 grown in Luria-Bertani broth (LB) added with an adequate concentration of benzoic acid or  
135 salicylic acid at 37°C, during 24 hours. All supernatants were fuded and the secretion  
136 biosurfactants was assessed by using emulsification assay (EI<sub>24</sub>).

### 137 **Statistical analysis**

138 GraphPad Prism 7 and Excel software were used for analysis. The data represent the  
139 arithmetical averages of at least three replicates. Data were expressed as mean ± SD and  
140 Student's test was used to determine statistical differences between strains and p <0.05 was  
141 considered as significant. Principal Component Analysis (PCA) was used to investigate  
142 possible correlations between *Shigella* and emulsification index (EI<sub>24</sub>). Prior to ordination,  
143 percentage of emulsification activities data were transformed to better meet the assumptions of  
144 normality [23] using ln (x+1). All analysis was performed using CANOCO (Canonical  
145 Community Ordination, version 4.5) [24].

146

147

148 **Results**

149 **Screening for biosurfactant production**

150 In order to carry out our research, we first assess if *Shigella* strains are able to produce BLM in  
151 extracellular medium. As results Figure 1 showed that environmental strains and clinical strains  
152 are able to secrete BLM by showing emulsification percentages ranging between 15% to 100%  
153 (Figure 1A). *S. flexneri* spa40- was not able to produce BLM compare with *Pseudomonas*  
154 *aeruginosa* used as positive control. The way of strains to produce BLM is shown in figure 1B  
155 all strains are not represented (Figure 1B).

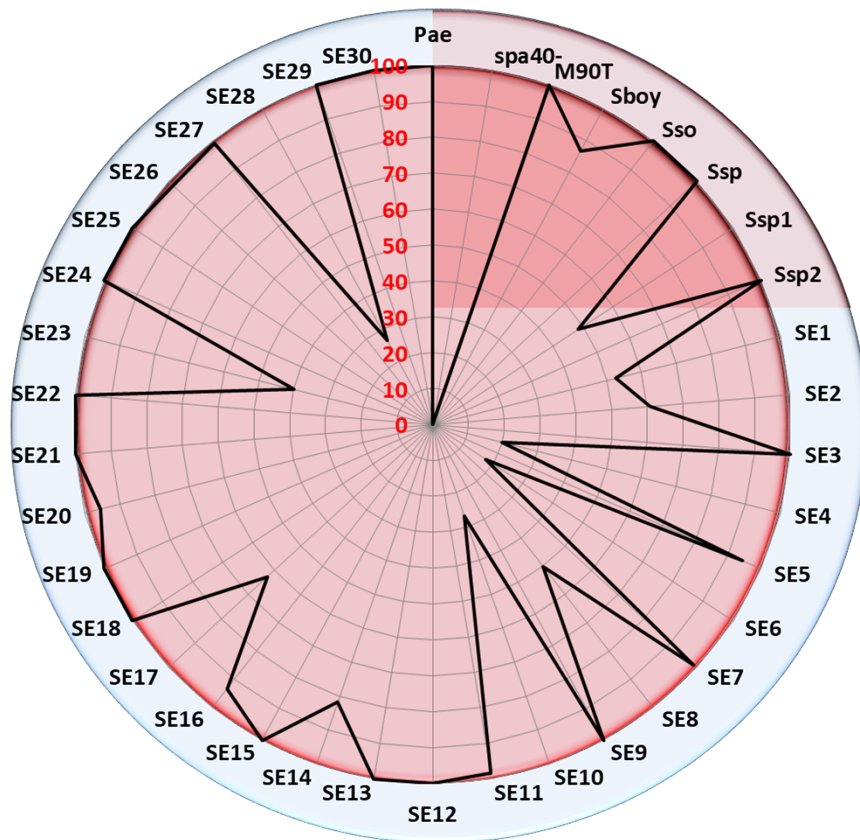

156

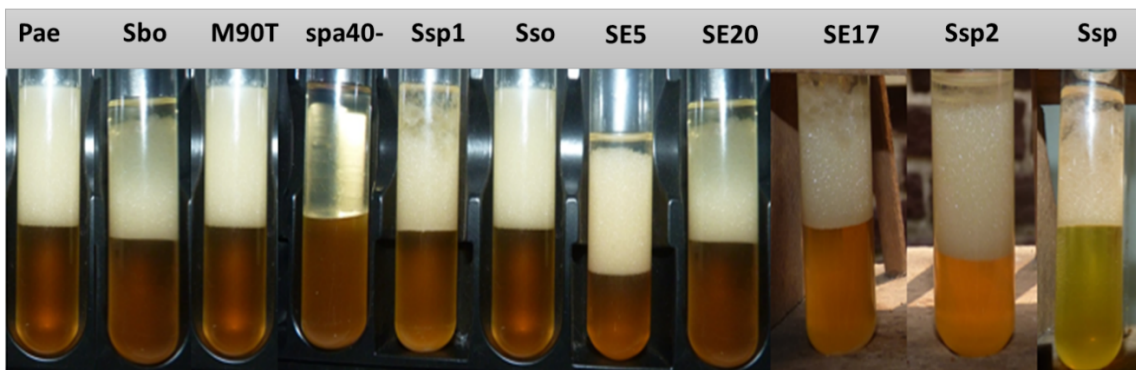

157

158 **Figure 1. A. Emulsification index percentage of all *Shigella* strains used in this study after**  
 159 **24 hours. Pae: *P. aeruginosa* used as positive control; M90T: *Shigella flexneri* 5a strain**  
 160 **M90T; *spa40*-: *S. flexneri spa40* mutant; Sbo: *S. boydii*; Sso: *S. sonnei*; Ssp, Ssp1, Ssp2:**  
 161 ***Shigella* sp. from clinical strains; SE1...30: *Shigella* sp. from environmental strains. B.**  
 162 **Emulsification index appearance of some *Shigella* strains.**

163 EI24 of Some strains are ranging from 80 to 100%. This is included *Shigella flexneri* M90T,  
 164 *Shigella boydii* (Sbo), *Shigella sonnei* (Sso), *Shigella* sp (Ssp), Ssp2, SE3, SE5, SE9, SE11,  
 165 SE12, SE13, SE14, SE15, SE16, SE18, SE20, SE21, SE22, SEI24, SE25, SE2626, SE27, SE29  
 166 and SE30 (Figure 2). The positive control has been found in this rate. SE1, SE8, SE23 and Ssp1  
 167 are ranging between 40 and 60%. SE4, SE10 and SE28 are between 20 and 40%. SE17 and SE2  
 168 from 60 to 80% and *Shigella flexneri spa40* mutant (*spa40*-) is not able to produce biosurfactant  
 169 and SE6 is about 17% ranging from 0 to 20% (Figure 2).

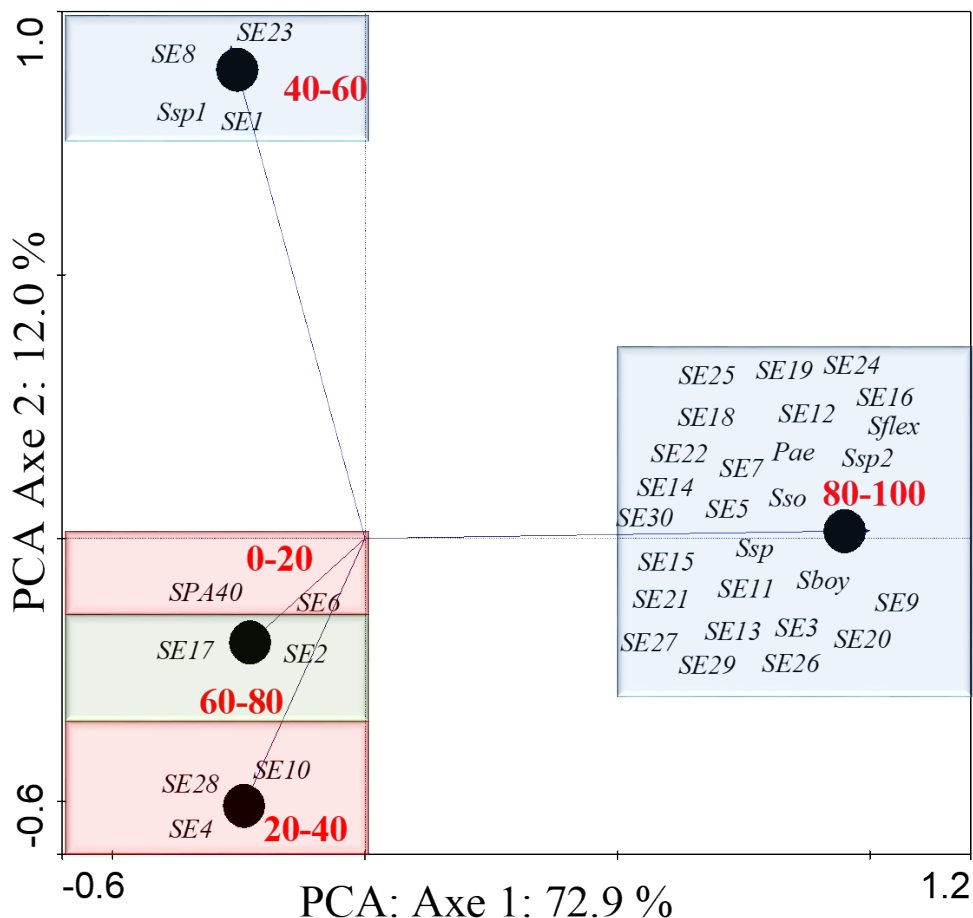



171 **Figure 2: PCA of *Shigella* strains basing on emulsification index (EI24). Pae: *P.***  
172 ***aeruginosa* used as positive control; S. flex: *S. flexneri* M90T; S. flex-: *S. flexneri spa40***  
173 **mutant ; Sboy: *S. boydii*; S. so: *S. sonnei*; Ssp 1, 2: *Shigella* sp clinical strain; S. E1...30:**  
174 ***Shigella* sp environmental strain.**

175

## 176 **The ability of *Shigella* strain in swarming test**

177 Swarming is induced by the production of BLM. In order to demonstrate how *Shigella* can  
178 disseminate in epithelial cell, we first investigated if all *Shigella* strains used in this study were  
179 able to swarm by using (0.5%) LB medium + 0.5% dextrose. As result *S. flexneri* M90T, *S.*  
180 *sonnei* and *S. boydii* were able to spread and swarm. *spa40-* was not able to swarm (Figure 3).  
181 Some examples of the swarming profile of some *Shigella* strain after 24 hours are illustrated.  
182 We found that *S. flexneri spa40-* cannot swarm and *S. sonnei* have a particular swarming profile  
183 than other *Shigella* strain used in this study.

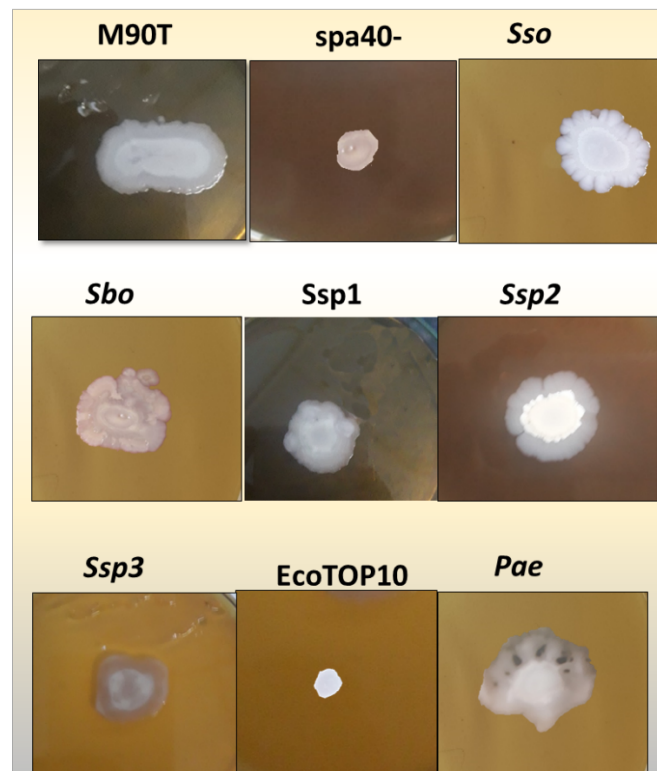

184

185 **Figure 3 : Swarming profile of *Shigella* strains. M90T: *Shigella flexneri* 5a strain M90T.**

186 **Sbo: *S. boydii* ; Sso: *S. sonnei* ; spa40-: *S. flexneri* 5a spa40- ; Ssp1, 2, 3: *Shigella* sp. Pae:**

187 ***P. aeruginosa* used as positive control and *E. coli*-Top10 used as negative control.**

### 188 **Bacterial Adhesion To Hydrocarbon (BATH)**

189 To highlight the production of BLM by *Shigella* strains to induce interaction with hydrophobic

190 areas, we performed analysis by evaluation of the ability to interact with hydrocarbon. The

191 Figure 4 shows the bacteria adhesion profile of some *Shigella* strains. As results only *S. flexneri*

192 Spa40 mutant does not interact with hydrocarbon area (Figure 4A). *S. flexneri*, *S. boydii* and *S.*

193 *sonnei* are positive with BATH techniques including a percentage of hydrophobicity of 17.64%,

194 21.42% and 22.22% respectively (Figure 4B).

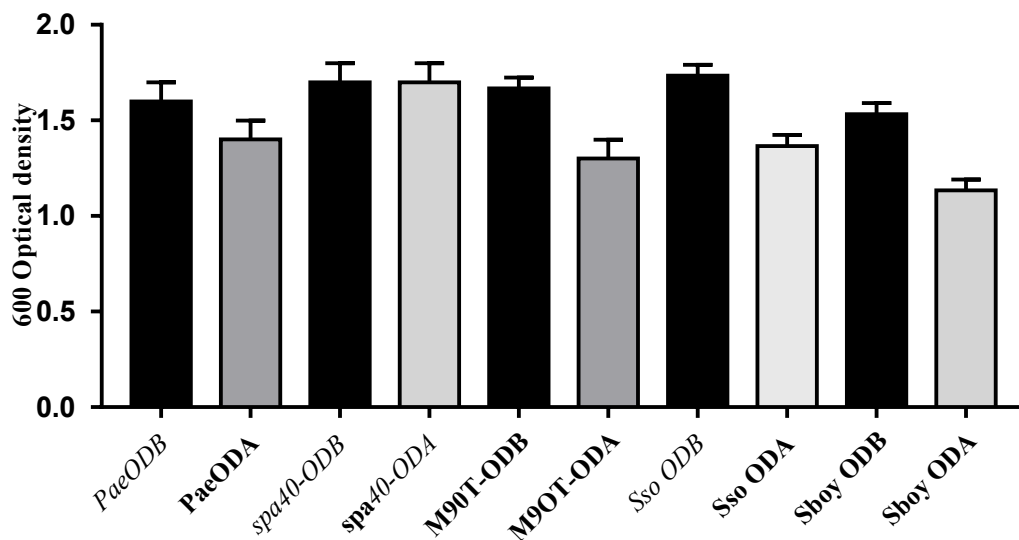

195

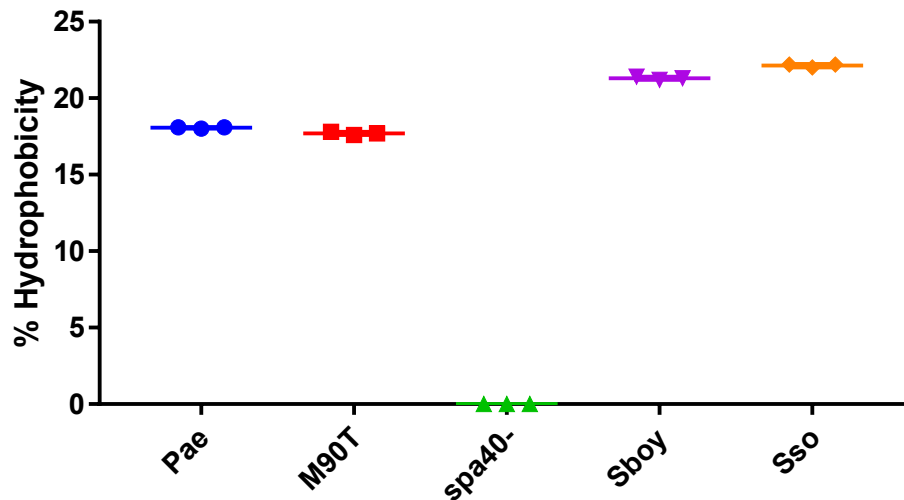

196

197 **Figure 4: A. *Shigella*'s adhesion to hydrocarbon phase of some strains used in this study.**

198 **ODB: optical density before vortexing. ODA: optical density after vortexing. M90T:**

199 ***Shigella flexneri* 5a strain M90T. Sbo: *S. boydii* ; Sso: *S. sonnei* ; spa40-: *S. flexneri* 5a**

200 **spa40-. Pae: *P. aeruginosa* used as positive control. B. Percentage hydrophobicity of**

201 ***Shigella* strains.**

202 **Screening of biosurfactant secreted by *Shigella* sp.**

203 To highlight the nature of the BLM secreted by *Shigella* strains used in this study. Cultures of

204 *Shigella* strains whose supernatant emulsified hydrocarbons (gazoline or diesel fuel), have been

205 used to identify the type of Biosurfactant like molecules. Precipitation on hydrochloric acid,

206 ammonium sulphate and ethanol have been done. All strains showed a precipitate at the bottom

207 of the tube. The emulsification index after precipitation has been carried on (EI24). Only

208 precipitate profile performed from the *S. flexneri* spa40- supernatant did not emulsify the gas

209 oil and/or diesel fuel. *S. flexneri*, *S. sonnei*, *S. boydii* and three *Shigella* sp. have 100 % of EI24

210 **(Figure 5).**

211

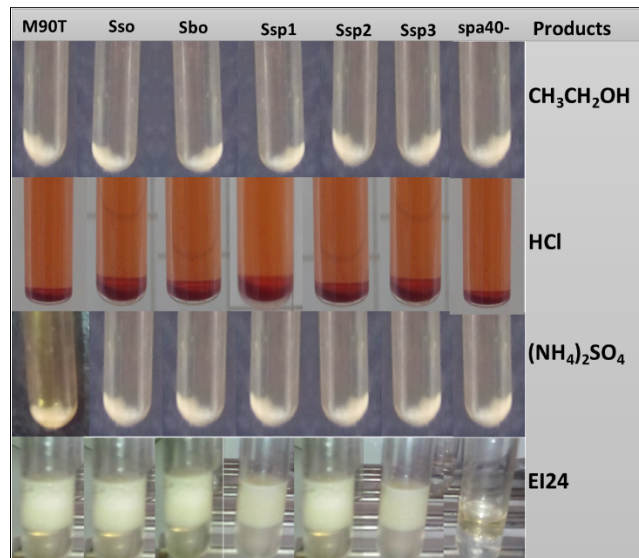

212

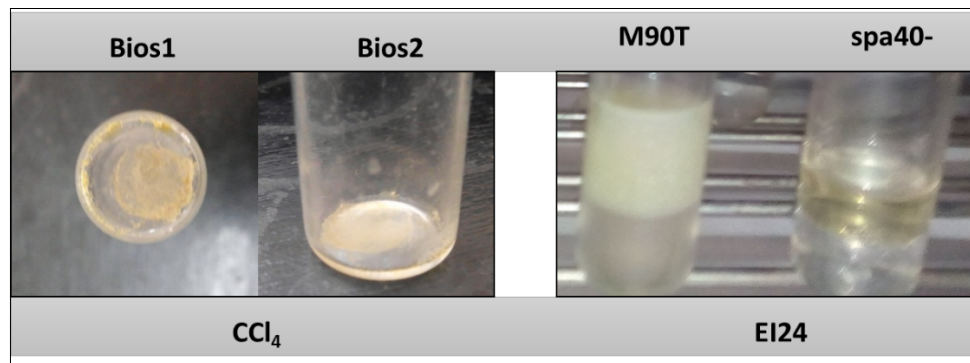

213

214 **Figure 5: BLM purified from *Shigella Species*. TOP: Profile obtained after precipitation with ethanol**  
215 **(CH<sub>3</sub>CH<sub>2</sub>OH), Hydrochlorid acid (HCl) and ammonium sulfate ((NH<sub>4</sub>)<sub>2</sub>SO<sub>4</sub>). EI24: emulsification index**  
216 **for all strains (*S. flexneri* M90T, *S. sonnei*, *S. boydii*, *Shigella* sp.: Ssp1, 2, and 3. Down: left: residues**  
217 **obtained after evaporation of Chloroform (CCl<sub>4</sub>). Right: Emulsification index (EI24) for the extractable**  
218 **biosurfactant like molecule. Bios1 and Bios2: Biosurfactant like molecule residues.**

219 Strains with known hydrocarbon emulsification ability were selected from an organic solvent  
220 like chloroform using biosurfactant extraction assay. Biosurfactant could be extracted after  
221 evaporation of chloroform at 40 ° C from *S. flexneri* M90T. Nothing was obtained from *spa40-*  
222 The extract after evaporation, suspended in PBS, was able to emulsify gasoline or gas oil with  
223 100 % of EI24.

224

## 225 The BLM is secreted by Type Three Secretion System (T3SS)

226 Clinical strains including *S. flexneri* M90T, *S. sonnei*, *S. boydii*, three *Shigella* sp. and 30  
227 environmental strains including SE1 to SE30 were cultivated to induce the secretion of effector  
228 on Congo red induction. As results *Shigella* species have been found to secrete BLM on Congo  
229 red induction conditions with EI24 ranging from 80 to 100% . The mutant *S. flexneri* spa40-  
230 did not emulsify the gasoline and /or diesel fuel in the presence of Congo induction with 0% of  
231 EI24 (Figure 6A). Emulsification after Congo red type 3 secretion system of *Shigella* strains  
232 appearance are illustrated in Figure 6 down.

233

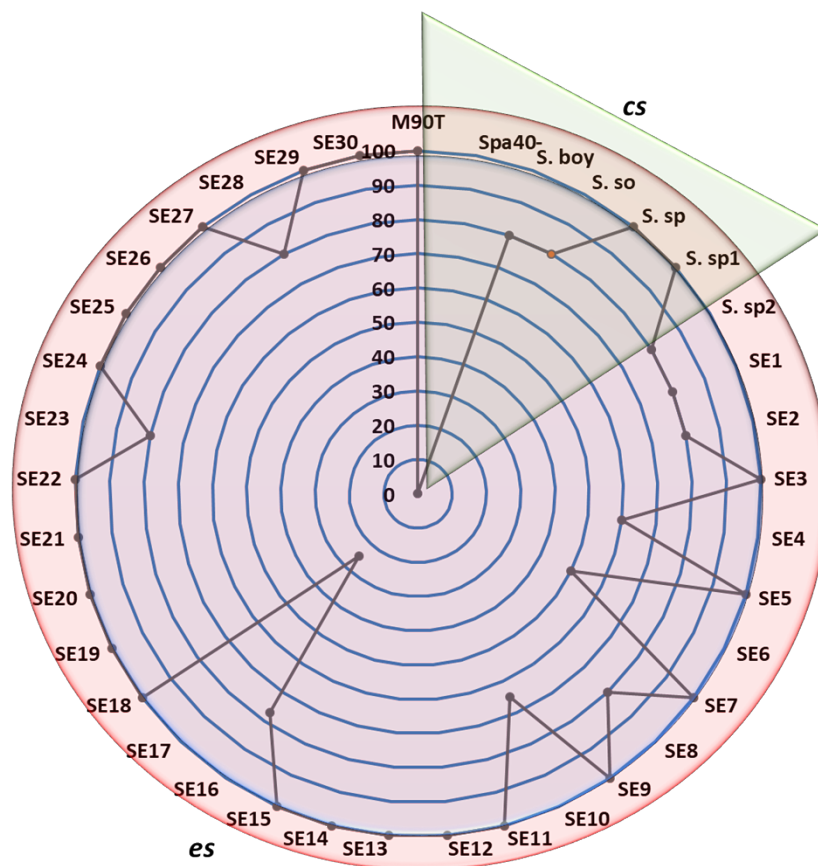

234

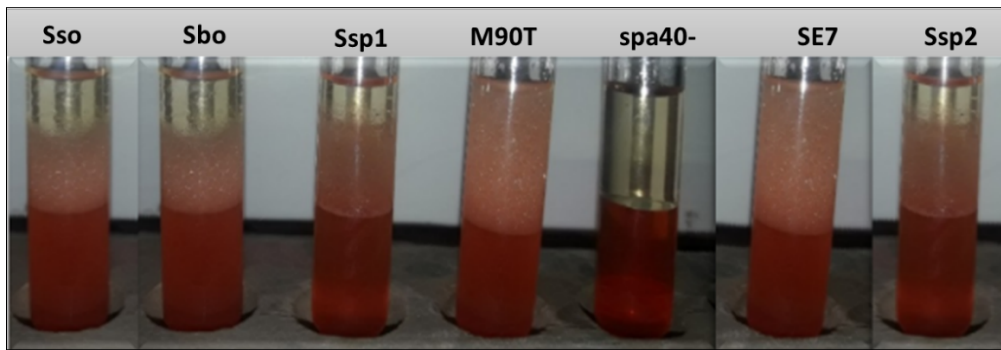

235

236 **Figure 6. Emulsification index after Congo red induction. UP. Pae: *P. aeruginosa* used as**  
237 **positive control; M90T: *Shigella flexneri* 5a strain M90T; *spa40-*: *S. flexneri spa40***  
238 **mutant; Sbo: *S. boydii*; Sso: *S. sonnei*; Ssp, Ssp1, Ssp2: *Shigella* sp. from clinical strains;**  
239 **SE1...30: *Shigella* sp. from environmental strains. Down. Emulsification index**  
240 **appearance of some *Shigella* strains.**

241

## 242 **Effect of Benzoic Acid and Salycilic acid on Biosurfactant production**

243 All *Shigella* strains were grown in Luria-Bertani broth (LB) in the presence of random  
244 concentrations of benzoic acid and salycilic acid (**Figure 7**). We examined growth at the various  
245 concentration of benzoic acid including 50 mM, 100 mM, 250 mM and 500 mM. As far as  
246 salycilic acid is concerned 1.5 mg/mL, 3 mg/mL, 6.25 mg/mL and 12.5 mg/mL were randomly  
247 selected. All *Shigella* strain grew normally within the physiological range of benzoic acid as  
248 determined by CFU per milliliter, but growth was significantly interesting at 100 mM benzoic  
249 acid and 1.5 mg/mL for salycilic acid (Figure 7).

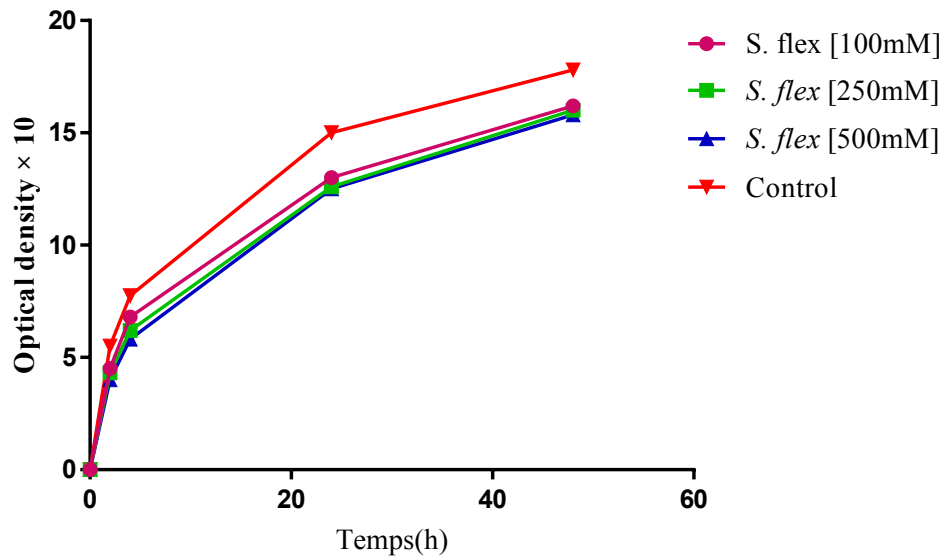

250

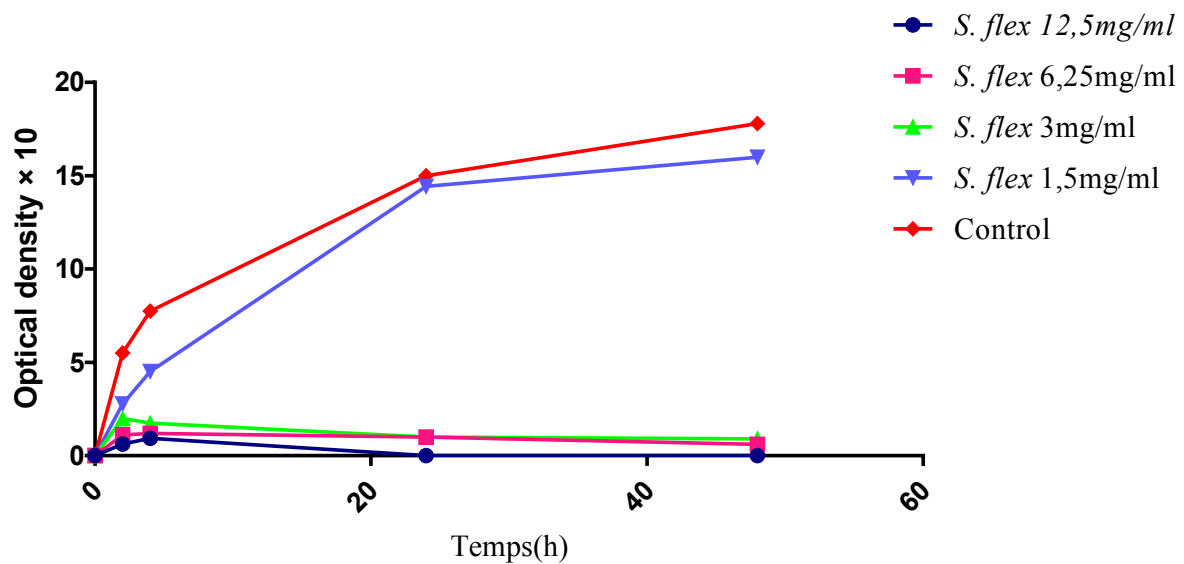

251

252

253

254 **Figure 7. Growth curve analysis of all *Shigella flexneri* M90T used in this study on the**  
255 **presence of benzoic acid (TOP) and salicylic acid (Down).**

256 To highlight the role of T3SS on the secretion of BLM we assessed the effect of benzoic and  
257 salicylic acids to inhibit the biosurfactant production. Bacteria were previously incubating  
258 with 100 mM benzoic acid (BA) and 1.5 mg/ml salicylic acid (SA), we showed that *S. flexneri*

259 M90T, *S. sonnei*, *S. boydii* and SE5 were not able to produce BLM with an emulsification index  
260 0% EI24. This is easily showed that all *Shigella* strains do not emulsify anymore gasoline or  
261 diesel fuel with benzoic acid or salicylic acid (Figure 8 up). Strains are able to emulsify gasoline  
262 or diesel fuel without benzoic acid or salicylic acid (Figure 8down). The appearance are  
263 illustrated in Figure 8 down. *P. aeruginosa* has been used as positive control since the T3SS is  
264 widely conserved in the most gram negative bacteria, surprisingly *P. aeruginosa* was able to  
265 produce 100% BLM in the presence or in the absence of BA and SA. It is worthy noticed that  
266 *spa40-* was not able to produce BLM neither in the presence nor in the absence as up  
267 mentionned (Figure 8).

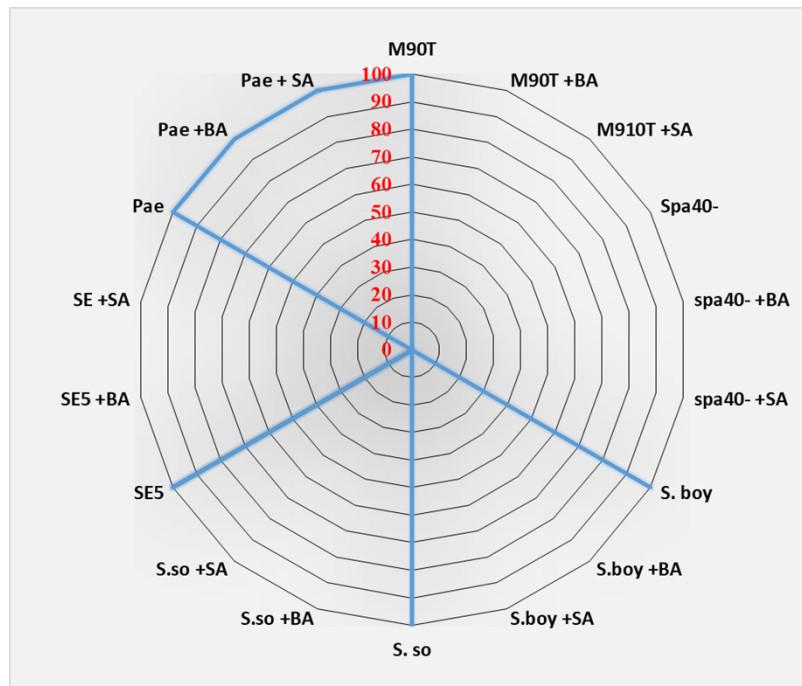

268



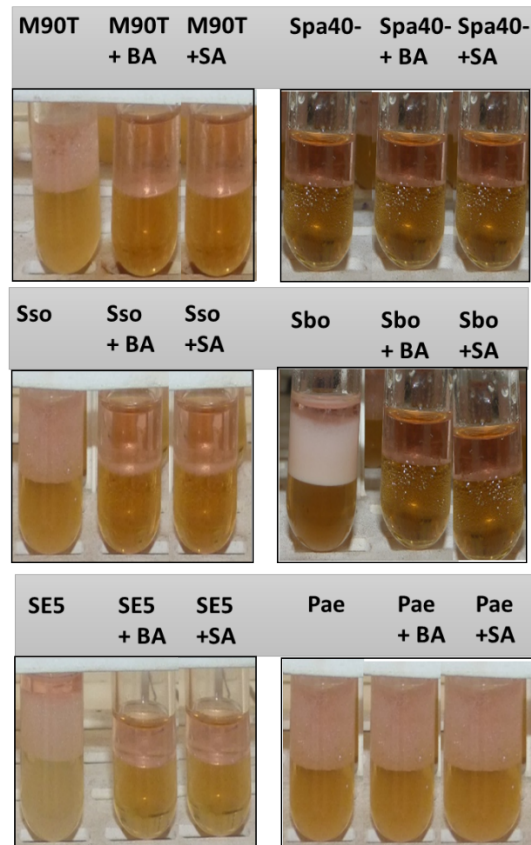

269

270

271 **Figure 8: (a). Gasoline emulsifying activity of some *Shigella* strains used in this study with**  
272 **and without benzoic acid (BA) and salicylic acid (SA). M90T: *S. flexneri* strain M90T.**  
273 **spa40-: *S. flexneri spa40* mutant, Sso : *S. sonnei*; Sbo: *S. boydii*; S.E: *Shigella* sp**  
274 **(environmental strain) and Pae: *P. aeruginosa* (b). Gasoline emulsifying activity**  
275 **appearances of some *Shigella* strain tested with and without benzoic acid or Salicylic acid.**

276

## 277 Discussion

278 This work was conducted with the prime aim to contribute to the understanding of the *S. flexneri*  
279 5a M90T epithelial cell invasion mechanisms. *Shigella* strains had been collected from the  
280 environmental areas, hospital or laboratory. All strains had the ability to produce BLM during  
281 growth in extracellular medium, and the production is strictly depending on T3SS pathway.

282 This result shows very clearly that these molecules are secreted in the extracellular medium as  
283 described by Usman and al. [25]. *spa40* mutant which has no T3SS cannot secrete BLM.  
284 Several studies have been demonstrated the role of T3SS in the secretion of numbers of effector  
285 proteins involved in invasion and dissemination [26-33].

286 The emulsification index is a direct method for demonstrating the ability of strains to produce  
287 biosurfactants or not [13]. Those molecules have been known to form emulsions between two  
288 immiscible liquids [34, 35]. Experiments carried out from the acellular supernatant showed that  
289 *S. flexneri* 5a M90T as well as *S. boydii*, *S. sonnei* and other *Shigella* sp. are able to emulsifying  
290 gasoline and diesel fuels with EI24 ranging from 80 to 100%. Gram negative bacteria are well  
291 documented to overcome this phenomenon. This is include *P. aeruginosa* [34, 35], *Salmonella*  
292 *enteridis* [36], *Acinetobacter* sp. [37], and *Serratia Marcescens* [38]. Gram positive bacteria  
293 are known as professional one in the production of BLM. The spore-forming bacteria like *B.*  
294 *subtilis*, *B. licheniformis* and *Lysinibacillus louembei* have been widely used to produce BLM  
295 [39-41].

296 Biosurfactants are native of several multicellular phenomena such as swarming described in  
297 several bacterial species [42-45]. By using specific culture media we have shown that all strain  
298 of *Shigella* genus were positive in swarming assay. The swarming phenomenon promote the  
299 ability for biosurfactants production. Since this phenomenon is associated with either antibiotic  
300 resistance, virulence and biofilm formation in *Proteus mirabilis*, *Salmonella enterica* serovar  
301 Typhimurium and *Serratia* [46-48]. This idea reinforces the fact that *Shigella* sp. could also use  
302 biosurfactants in its pathogenicity. No genes have been identified to be directly involved in  
303 BLM biosynthesis. In this work we found that *ygaG* is a chromosomal gene of *S. flexneri* M90T.  
304 YgaG which is the product of this gene shares 90 % of identity with LuxS involving in quorum  
305 sensing and biofilm formation [49, 50]. RhIA, RhIB and RhIR proteins are known to promote

306 the rhamnolipid secretion [51]. The secretion of biosurfactant are correlated with quorum  
307 sensing [52].

308 Pathogenicity in genus *Shigella* is determined by T3SS that has the ability to secrete myriad of  
309 effector proteins into the target cell [11, 53]. In the absence of cellular contact, the secretory  
310 apparatus is not functional [54], however some proteins are secreted in leak condition. Cell  
311 contact is mimicking by the use of Congo red [55]. Under the Congo red induction condition,  
312 all *Shigella* strains emulsified gasoline and diesel fuels while the *S. flexneri* 5a M90T spa40  
313 mutant did not emulsify anymore. The mutant *S. flexneri spa40-* has not T3SS [26]. The *S.*  
314 *flexneri spa40-* in non-inducible condition [56] or in a Congo red induction condition, does not  
315 produce BLM. In addition by blocking T3SS using benzoic and salycilic acids compounds, we  
316 have demonstrated that BLM could not be secreted in extracellular medium. This is confirm  
317 that BLM is secreted via T3SS. *P. aeruginosa* could secrete in the presence or in the absence  
318 of inhibitors. This allows us to postulate that rhamnolipid molecule could use another pathway.  
319 An efflux mechanism is the top in *P. aeruginosa* [25, 57]. This inhibition assay with benzoic  
320 acid and Salycilic acids showed a perfect correlation between the secretion of the BLM  
321 synthesized by *Shigella* and the inactivation of the type III secretion apparatus.

322 Regarding the BLM characteristics, precipitation assay like hydrochloric acid, ammonium  
323 sulfate and ethanol allowed to postulate that the secreted BLM could have a lipopeptide or  
324 peptide features. Only peptide or lipopeptide biosurfactants can precipitate at very low pH or  
325 with ammonium sulphate [22, 58]. In proteomics studies, the sequential precipitation of  
326 ammonium sulfate proteins allows the proteins to be separated by "salting-in" or "salting-out"  
327 effect [59], which necessarily leads to the formation of protein aggregates and therefore to their  
328 precipitation. The BLM precipitate was able to emulsify gasoline and diesel fuel. Biosurfactants  
329 like rhamnolipid, surfactin, emulsan are extractable by organic solvents [35, 60]. In addition

330 our study showed that the biosurfactant excreted by *Shigella sp.* is extractable with chloroform  
331 with higher efficiency and stability at 40 ° C.

332 BML are known to play several vital roles especially in microbe's adhesion, bioavailability,  
333 desorption and defense strategy. The most important role of microbial BLM is well reviewed  
334 for adhesion of the interfaces cells-cells interactions [61]. *P. aeruginosa* is a best example of  
335 cell surface hydrophobicity that justifies by the presence of cell-bound rhamnolipid [62]. Our  
336 new finding showed that by secreting BLM, *Shigella sp.* can easily bind to the cell hydrophobic  
337 interfaces by interacting with lipid rafts [27, 63-65]. By binding on cell membrane, BLM allows  
338 to reduce the membrane tension and to help the translocon like IpaB-C [66, 67] and the tip  
339 component IpaD [29, 32] to be closed to the host membrane and automatically to be inserted  
340 inside cytoplasmic membrane.

341 Many mechanisms have been demonstrated how *S. flexneri* can disseminate inside epithelial  
342 cells [68, 69], helping to escape autophagy phenomenon [70] and to spread inside host cell [71]  
343 by using a specific domain of IcsB that interacts with cholesterol [27]. In this work we showed  
344 that *S. flexneri*, *S. boydii* and *S. sonnei* can spread using swarming phenomenon. No studies  
345 have been previously documented about this strategy. This is efficiently emphasized and  
346 amplified the idea that *Shigella* is able to use several mechanisms that help *Shigella* to spread  
347 from cell to cell by secreting BLM. We are investigating the secretion of BLM inside epithelial  
348 cells. Basing on our finding, we can make a proposal that *Shigella* can invade and disseminate  
349 inside epithelial cells by using BLM.

350

## 351 **Conclusion**

352 In order to contribute to the understanding of the mechanism of invasion of epithelial cells by  
353 *Shigella sp.* we have first shown that all *Shigella* strain as well as clinical strain or

354 environmental strain are able to secrete biosurfactant like molecules directly in the extracellular.  
355 Secondly, we have shown that the secretion of biosurfactants like molecule are depending on  
356 Type Three Secretion System (T3SS). Our study suggest that, the biosurfactant with lipopeptide  
357 or peptide features, stable at 40°C, could play an outstanding role on *Shigella* pathogenicity  
358 mechanisms including bacteria-host cell interaction, cell metabolism and cell dissemination.  
359 This work open ways to the understanding of genes associated with a couple of component that  
360 are able to promote the biosynthesis, the regulation and the secretion of BLM. MALDI-TOF  
361 and HPLC will be interesting to be done in order to characterize BLM.

### 362 **Data Availability**

363 The Excel and Prism7 sheet including the data used to support the findings of this study are  
364 available from the corresponding author upon request.

### 365 **Conflicts of Interest**

366 The authors declare that the research was conducted in the absence of any intellectual  
367 commercial or financial relationships that could be construed as potential conflicts of interest.

### 368 **Acknowledgments**

369 We are grateful to Prof. Eric Déziel (Centre Armand-Frappier Santé Biotechnologie), Prof.  
370 Anne Botteaux (Free University of Brussels) for their continuous encouragements and for  
371 helpful data analysis before publication.

372

### 373 **References**

- 374 1. Organization WH. Food Safety: issues-public health significance of foodborne illnesses. Food  
375 Safety Programme. Regional Office for the Western Pacific. 2003.
- 376 2. Karen L Kotloff MSR, James A Platts-Mills, Patricia Pavlinac, Anita K M Zaidi. Shigellosis.  
377 Lancet 2018;391: 801–12

- 378 3. Collaborators GDD. Estimates of global, regional, and national morbidity, mortality, and  
379 aetiologies of diarrhoeal diseases: a systematic analysis for the Global Burden of Disease Study  
380 Lancet Infect Dis 2017. 2015;17:909–48.
- 381 4. Kotloff KL NJ, Blackwelder WC, et al. Burden and aetiology of diarrhoeal disease in infants  
382 and young children in developing countries (the Global Enteric Multicenter Study, GEMS): a  
383 prospective, case-control study. Lancet 2013;382:209-22.
- 384 5. Liu J P-MJ, Juma J, et al. . Use of quantitative molecular diagnostic methods to identify  
385 causes of diarrhoea in children: a reanalysis of the GEMS case-control study. Lancet. 2016;388:1291-  
386 301.
- 387 6. Kotloff KL WJ, Ivanoff B, et al. . Global burden of shigella infections: implications for vaccine  
388 development and implementation. Bull World Health Organ. 1999;77:651-56.
- 389 7. Benoit S. Marteyn ADGaPJS. Shigella A model of virulence regulation in vivo. Gut Microbes  
390 2012;3(2): 104–20. doi: <http://dx.doi.org/10.4161/gmic.19325>.
- 391 8. DuPont HL LM, Hornick RB, Formal SB. Inoculum size in shigellosis and implications for  
392 expected mode of transmission. J Infect Dis. 1989;159:1126-28.
- 393 9. Sansonetti PJ, Arondel, J., Cavaillon, J. M., & Huerre, M. . Role of interleukin-1 in the  
394 pathogenesis of experimental shigellosis. J Clin Invest. 1995;96:884-92.
- 395 10. Hale TL. Genetic basis of virulence in Shigella species. Microbiol Rev. 1998;55:206-24.
- 396 11. Kayath AC, Hussey, S., hajjami, N. E., Nagra, K., Philpott, D., & Allaoui, A. . Escape of  
397 intracellular Shigella from autophagy requires binding to cholesterol through the type III effector,  
398 IcsB. Microbes and Infection. 2010;12:956 - 66.
- 399 12. Parsot C, Menard, R., Gounon, P., & Sansonetti, P. J. . Enhanced secretion through the  
400 Shigella flexneri Mxi-Spa translocon leads to assembly of extracellular proteins into macromolecular  
401 structures. Mol Microbiol. 1995;16:291-300.
- 402 13. Kayath CA, Ibalá Zamba A, Goma-Tchimbakala J, Mamonekene V, Mombo Makanga GM,  
403 Lebonguy AA, et al. Microbiota Landscape of Gut System of Guppy Fish (*Poecilia reticulata*) Plays an  
404 Outstanding Role in Adaptation Mechanisms. Int J Microbiol. 2019;2019:3590584. Epub 2019/04/06.  
405 doi: 10.1155/2019/3590584. PubMed PMID: 30949206; PubMed Central PMCID: PMC6425301.
- 406 14. Roychoudhury SYaK. Emulsifying and flocculating performances of exopolysaccharides  
407 produced by *Bacillus subtilis* strains and *Shigella flexneri*. International Journal of Research and  
408 Analytical Reviews (IJRAR) 2018;5(4):453-6.
- 409 15. Marchant RB, I.M. . Microbial biosurfactants: Challenges and opportunities for future  
410 exploitation. Trends Biotechnol. 2012;30:558-65.
- 411 16. Banat IMM, R.S.; Cameotra, S.S. . Potential commercial applications of microbial surfactants.  
412 Appl Microbiol Biotechnol. 2000;53:495-508.
- 413 17. Cameotra S, & Makkar, R. . Recent applications of biosurfactants as biological and  
414 immunological molecules. Current Opinion in Microbiology. 2004;7(3):262-6.
- 415 18. Déziel E, Lépine, F., Milot, S., & Villemur., R. rhlA is required for the production of a novel  
416 biosurfactant promoting swarming motility in *Pseudomonas aeruginosa*: 3-(3-  
417 hydroxyalkanoyloxy)alkanoic acids (HAAs), the precursors of rhamnolipids. Microbiology.  
418 2003;149:2005–13.
- 419 19. Makaya PN, Guessennd, N. K., Kayath, C. A., Gba, K. K., Gbonon, V., Nguetta, S.-P. A., &  
420 Dosso, M. Emergence of Antibiotic Resistance and Correlation with the Efflux Pump in *Pseudomonas*  
421 *aeruginosa* Isolated from Abidjan Hospital. International Journal of Science and Research (IJSR).  
422 2017;6(3):481-90.
- 423 20. Sharma M, & Arnaud, S. K. Swarming: A coordinated bacterial activity. Curr Sci.  
424 2002;83:707-15.
- 425 21. Rosenberg M, Gutnick, D., & Rosenberg, E. . Adherence of bacteria to hydrocarbons: a simple  
426 method for measuring cell-surface hydrophobicity. FEMS Microbiology Letters. 1980;9:29-33.
- 427 22. Vater J, Kablitz, B., Wilde, C., Franke, P., Mehta, N., & Cameotra, S. . Matrix-assisted laser  
428 desorption ionization-time of flight mass spectrometry of lipopeptide biosurfactants in whole cells  
429 and culture filtrates of *Bacillus subtilis* C-1 isolated from petroleum sludge. Appl Environ Microbiol.  
430 2002;68:6210–9.

- 431 23. Fischer JR, Paukert CP. Habitat relationships with fish assemblages in minimally disturbed  
432 Great Plains regions. *Ecology of Freshwater Fish*. 2008;17(4):597–609.
- 433 24. Ter Braak CJF, Šmilauer P. *Canoco 4*. Cambridge University Press, New York, NY, USA. 2003.
- 434 25. Usman MM, Dadrasnia, A., Lim, K. T., Mahmud, A. F., & Ismail, S. Application of  
435 biosurfactants in environmental biotechnology, remediation of oil and heavy metal. *AIMS*  
436 *Bioengineering*. 3(3):289-304.
- 437 26. Botteaux A, Kayath CA, Page AL, Jouihri N, Sani M, Boekema E, et al. The 33 carboxyl-terminal  
438 residues of Spa40 orchestrate the multi-step assembly process of the type III secretion needle  
439 complex in *Shigella flexneri*. *Microbiology*. 2010;156(Pt 9):2807-17. Epub 2010/05/29. doi:  
440 10.1099/mic.0.039651-0. PubMed PMID: 20507885.
- 441 27. Kayath CA, Hussey S, El hajjami N, Nagra K, Philpott D, Allaoui A. Escape of intracellular  
442 *Shigella* from autophagy requires binding to cholesterol through the type III effector, IcsB. *Microbes*  
443 *Infect*. 2010;12(12-13):956-66. Epub 2010/07/06. doi: 10.1016/j.micinf.2010.06.006. PubMed PMID:  
444 20599519.
- 445 28. Botteaux A, Sani M, Kayath CA, Boekema EJ, Allaoui A. Spa32 interaction with the inner-  
446 membrane Spa40 component of the type III secretion system of *Shigella flexneri* is required for the  
447 control of the needle length by a molecular tape measure mechanism. *Mol Microbiol*.  
448 2008;70(6):1515-28. Epub 2008/11/21. doi: 10.1111/j.1365-2958.2008.06499.x. PubMed PMID:  
449 19019157.
- 450 29. Schiavolin L, Meghraoui A, Cherradi Y, Biskri L, Botteaux A, Allaoui A. Functional insights into  
451 the *Shigella* type III needle tip IpaD in secretion control and cell contact. *Mol Microbiol*.  
452 2013;88(2):268-82. Epub 2013/02/21. doi: 10.1111/mmi.12185. PubMed PMID: 23421804.
- 453 30. El Hajjami N, Moussa S, Houssa J, Monteyne D, Perez-Morga D, Botteaux A. The inner-rod  
454 component of *Shigella flexneri* type 3 secretion system, MxiI, is involved in the transmission of the  
455 secretion activation signal by its interaction with MxiC. *Microbiologyopen*. 2018;7(1). Epub  
456 2017/12/02. doi: 10.1002/mbo3.520. PubMed PMID: 29194994; PubMed Central PMCID:  
457 PMC5822323.
- 458 31. Cherradi Y, Schiavolin L, Moussa S, Meghraoui A, Meksem A, Biskri L, et al. Interplay between  
459 predicted inner-rod and gatekeeper in controlling substrate specificity of the type III secretion  
460 system. *Mol Microbiol*. 2013;87(6):1183-99. Epub 2013/01/23. doi: 10.1111/mmi.12158. PubMed  
461 PMID: 23336839.
- 462 32. Sani M, Botteaux A, Parsot C, Sansonetti P, Boekema EJ, Allaoui A. IpaD is localized at the tip  
463 of the *Shigella flexneri* type III secretion apparatus. *Biochim Biophys Acta*. 2007;1770(2):307-11. Epub  
464 2006/11/18. doi: 10.1016/j.bbagen.2006.10.007. PubMed PMID: 17110044.
- 465 33. Botteaux A, Sory MP, Biskri L, Parsot C, Allaoui A. MxiC is secreted by and controls the  
466 substrate specificity of the *Shigella flexneri* type III secretion apparatus. *Mol Microbiol*.  
467 2009;71(2):449-60. Epub 2008/11/20. doi: 10.1111/j.1365-2958.2008.06537.x. PubMed PMID:  
468 19017268.
- 469 34. Zdarta A, Smulek W, Trzcinska A, Cybulski Z, Kaczorek E. Properties and potential application  
470 of efficient biosurfactant produced by *Pseudomonas* sp. KZ1 strain. *J Environ Sci Health A Tox Hazard*  
471 *Subst Environ Eng*. 2019;54(2):110-7. Epub 2019/01/08. doi: 10.1080/10934529.2018.1530537.  
472 PubMed PMID: 30614383.
- 473 35. Varjani SJ, Upasani VN. Critical review on biosurfactant analysis, purification and  
474 characterization using rhamnolipid as a model biosurfactant. *Bioresour Technol*. 2017;232:389-97.  
475 Epub 2017/02/28. doi: 10.1016/j.biortech.2017.02.047. PubMed PMID: 28238638.
- 476 36. Rossi EM, Beilke L, Kochhann M, Sarzi DH, Tondo EC. Biosurfactant Produced by *Salmonella*  
477 *Enteritidis* SE86 Can Increase Adherence and Resistance to Sanitizers on Lettuce Leaves (*Lactuca*  
478 *sativa* L., cichoraceae). *Front Microbiol*. 2016;7:9. Epub 2016/02/03. doi: 10.3389/fmicb.2016.00009.  
479 PubMed PMID: 26834727; PubMed Central PMCID: PMC4722381.
- 480 37. Chen G, Qiao M, Zhang H, Zhu H. Bacterial desorption in water-saturated porous media in the  
481 presence of rhamnolipid biosurfactant. *Res Microbiol*. 2004;155(8):655-61. Epub 2004/09/24. doi:  
482 10.1016/j.resmic.2004.05.001. PubMed PMID: 15380553.

- 483 38. Araujo HWC, Andrade RFS, Montero-Rodriguez D, Rubio-Ribeaux D, Alves da Silva CA,  
484 Campos-Takaki GM. Sustainable biosurfactant produced by *Serratia marcescens* UCP 1549 and its  
485 suitability for agricultural and marine bioremediation applications. *Microb Cell Fact.* 2019;18(1):2.  
486 Epub 2019/01/06. doi: 10.1186/s12934-018-1046-0. PubMed PMID: 30609918; PubMed Central  
487 PMCID: PMC6318876.
- 488 39. Cooper DG, & Goldenberg, B. G. Surfaceactive agents from two *Bacillus* species. *Appl Environ*  
489 *Microbiol.* 1987;53:224-9.
- 490 40. Satpute SK, Banpurkar, A. G., Dhakephalkar, P. K., Banat, I. M., & Chopade, B. A. . Methods  
491 for investigating biosurfactants and bioemulsifiers: a review. *Critical Reviews in Biotechnology.*  
492 2010;30(2):127–44.
- 493 41. Kaya-Ongoto MD, Kayath CA, Mbozo ABV, Mitoko GM, Wilson SPE, Kinavouidi DJK, et al.  
494 Prime Enzymatic Exocellular Background of *Lysinibacillus louembei* . . *Advances in Microbiology* , .  
495 2020;95-109(10).
- 496 42. Déziel E, Lépine, F., Milot, S., & Villemur., R. rhlA is required for the production of a novel  
497 biosurfactant promoting swarming motility in *Pseudomonas aeruginosa*: 3-(3-  
498 hydroxyalkanoyloxy)alkanoic acids (HAAs), the precursors of rhamnolipids. *Microbiology,*.  
499 2003;149:2005–13.
- 500 43. Jarrell KF, & McBride, M. J. The surprisingly diverse ways that prokaryotes move. *Nat Rev*  
501 *Microbiol.* 2008;(6):466–76.
- 502 44. Verstraeten N. Living on a surface: swarming and biofilm formation. *Trends Microbiol.*  
503 16:496–506.
- 504 45. Kearns DB. A field guide to bacterial swarming motility. *Nat Rev Microbiol.* 8:634–44.
- 505 46. Belas R, & Sivanasuthi., R. . The ability of *Proteus mirabilis* to sense surfaces and regulate  
506 virulence gene expression involves FlhL, a flagellar basal body protein. *J Bacteriol.* 2005;187:6789–  
507 803.
- 508 47. Williamson NR, Fineran, P. C., Ogawa, W., Woodley, L. R., & Salmond, G. P. . Integrated  
509 regulation involving quorum sensing, a two-component system, a GGDEF/EAL domain protein and a  
510 post-transcriptional regulator controls swarming and RhlA-dependent surfactant biosynthesis in  
511 *Serratia*. *Environ Microbiol.* 2008;10:1202–17.
- 512 48. Butler MT, Wang, Q., & Harshey, R. M. . Cell density and mobility protect swarming bacteria  
513 against antibiotics. *Proc Natl Acad Sci U S A.* 2010;107:3776–81.
- 514 49. Day WA, Jr., Maurelli AT. *Shigella flexneri* LuxS quorum-sensing system modulates virB  
515 expression but is not essential for virulence. *Infect Immun.* 2001;69(1):15-23. Epub 2000/12/19. doi:  
516 10.1128/IAI.69.1.15-23.2001. PubMed PMID: 11119484; PubMed Central PMCID: PMC97850.
- 517 50. Brito PH, Rocha EP, Xavier KB, Gordo I. Natural genome diversity of AI-2 quorum sensing in  
518 *Escherichia coli*: conserved signal production but labile signal reception. *Genome Biol Evol.*  
519 2013;5(1):16-30. Epub 2012/12/19. doi: 10.1093/gbe/evs122. PubMed PMID: 23246794; PubMed  
520 Central PMCID: PMC3595036.
- 521 51. Soberon-Chavez G, Aguirre-Ramirez M, Sanchez R. The *Pseudomonas aeruginosa* RhlA  
522 enzyme is involved in rhamnolipid and polyhydroxyalkanoate production. *J Ind Microbiol Biotechnol.*  
523 2005;32(11-12):675-7. Epub 2005/06/07. doi: 10.1007/s10295-005-0243-0. PubMed PMID:  
524 15937697.
- 525 52. Pearson JP, Pesci EC, Iglewski BH. Roles of *Pseudomonas aeruginosa* las and rhl quorum-  
526 sensing systems in control of elastase and rhamnolipid biosynthesis genes. *J Bacteriol.*  
527 1997;179(18):5756-67. Epub 1997/09/19. doi: 10.1128/jb.179.18.5756-5767.1997. PubMed PMID:  
528 9294432; PubMed Central PMCID: PMC179464.
- 529 53. Sansonetti PJ, Arondel, J., Cantey, J. R., Prevost, M. C., & Huerre, M. . Infection of rabbit  
530 Peyer's patches by *Shigella flexneri*: effect of adhesive or invasive bacterial phenotypes on follicle-  
531 associated epithelium. *Infect Immun.* 1996;64:2752-64.
- 532 54. Ahaliyah Anantharajah M-PM-L. Targeting the Type Three Secretion System in *Pseudomonas*  
533 *aeruginosa*. *Trends in Pharmacological Sciences Cell Press.* 2016.
- 534 55. Botteaux A, Sani, M., Kayath, C. A., Boekema, E. J., & Allaoui, A. . Spa32 interaction with the  
535 inner-membrane Spa40 component of the type III secretion system of *Shigella flexneri* is required for



- 536 the control of the needle length by a molecular tape measure mechanism. *Molecular Microbiology*.  
537 2008;70(6):1515–28.
- 538 56. Parsot C. Shigella type III secretion effectors: how, where, when, for what purposes? . *Curr*  
539 *Opin Microbiol*. 2009;12:110-6.
- 540 57. Ochsner UA, & Reiser, J. . Autoinducer-mediated regulation of rhamnolipid biosurfactant  
541 synthesis in *Pseudomonas aeruginosa*. *Proc Natl Acad Sci USA*. 1995;92(14):6424-8.
- 542 58. Banat IM, Smyth, T. J., Perfumo, A., McClean, S., & Marchant, R. . Isolation and Analysis of  
543 Lipopeptides and High Molecular Weight Biosurfactants. 2010.
- 544 59. Green A. Protein solubility on the basis of solubility in aqueous solutions of salts and organic  
545 solvents. *Methods Enzymol* 1995;1:67-90.
- 546 60. Singh P, Patil Y, Rale V. Biosurfactant production: emerging trends and promising strategies. *J*  
547 *Appl Microbiol*. 2019;126(1):2-13. Epub 2018/08/02. doi: 10.1111/jam.14057. PubMed PMID:  
548 30066414.
- 549 61. Cameotra SS, Makkar RS, Kaur J, Mehta SK. Synthesis of biosurfactants and their advantages  
550 to microorganisms and mankind. *Adv Exp Med Biol*. 2010;672:261-80. Epub 2010/06/16. doi:  
551 10.1007/978-1-4419-5979-9\_20. PubMed PMID: 20545289.
- 552 62. Zhang Y, Miller RM. Effect of a *Pseudomonas* rhamnolipid biosurfactant on cell  
553 hydrophobicity and biodegradation of octadecane. *Appl Environ Microbiol*. 1994;60(6):2101-6. Epub  
554 1994/06/01. PubMed PMID: 8031099; PubMed Central PMCID: PMCPMC201607.
- 555 63. Lafont F, van der Goot FG. Bacterial invasion via lipid rafts. *Cell Microbiol*. 2005;7(5):613-20.  
556 Epub 2005/04/21. doi: 10.1111/j.1462-5822.2005.00515.x. PubMed PMID: 15839890.
- 557 64. Edidin M. The state of lipid rafts: from model membranes to cells. *Annu Rev Biophys Biomol*  
558 *Struct*. 2003;32:257-83. Epub 2003/01/25. doi: 10.1146/annurev.biophys.32.110601.142439.  
559 PubMed PMID: 12543707.
- 560 65. Hayward RD, Cain RJ, McGhie EJ, Phillips N, Garner MJ, Koronakis V. Cholesterol binding by  
561 the bacterial type III translocon is essential for virulence effector delivery into mammalian cells. *Mol*  
562 *Microbiol*. 2005;56(3):590-603. Epub 2005/04/12. doi: 10.1111/j.1365-2958.2005.04568.x. PubMed  
563 PMID: 15819617.
- 564 66. Yang SC, Hung CF, Aljuffali IA, Fang JY. The roles of the virulence factor IpaB in *Shigella* spp. in  
565 the escape from immune cells and invasion of epithelial cells. *Microbiol Res*. 2015;181:43-51. Epub  
566 2015/12/08. doi: 10.1016/j.micres.2015.08.006. PubMed PMID: 26640051.
- 567 67. Blocker A, Gounon P, Larquet E, Niebuhr K, Cabiaux V, Parsot C, et al. The tripartite type III  
568 secretion of *Shigella flexneri* inserts IpaB and IpaC into host membranes. *J Cell Biol*. 1999;147(3):683-  
569 93. Epub 1999/11/05. doi: 10.1083/jcb.147.3.683. PubMed PMID: 10545510; PubMed Central  
570 PMCID: PMCPMC2151192.
- 571 68. Agaisse H. Molecular and Cellular Mechanisms of *Shigella flexneri* Dissemination. *Front Cell*  
572 *Infect Microbiol*. 2016;6:29. Epub 2016/03/26. doi: 10.3389/fcimb.2016.00029. PubMed PMID:  
573 27014639; PubMed Central PMCID: PMCPMC4786538.
- 574 69. Koestler BJ, Fisher CR, Payne SM. Formate Promotes *Shigella* Intercellular Spread and  
575 Virulence Gene Expression. *mBio*. 2018;9(5). Epub 2018/09/27. doi: 10.1128/mBio.01777-18.  
576 PubMed PMID: 30254126; PubMed Central PMCID: PMCPMC6156198.
- 577 70. Ogawa M, Suzuki T, Tatsuno I, Abe H, Sasakawa C. IcsB, secreted via the type III secretion  
578 system, is chaperoned by IpgA and required at the post-invasion stage of *Shigella* pathogenicity. *Mol*  
579 *Microbiol*. 2003;48(4):913-31. Epub 2003/05/20. doi: 10.1046/j.1365-2958.2003.03489.x. PubMed  
580 PMID: 12753186.
- 581 71. Allaoui A, Mounier J, Prevost MC, Sansonetti PJ, Parsot C. icsB: a *Shigella flexneri* virulence  
582 gene necessary for the lysis of protrusions during intercellular spread. *Mol Microbiol*.  
583 1992;6(12):1605-16. Epub 1992/06/01. doi: 10.1111/j.1365-2958.1992.tb00885.x. PubMed PMID:  
584 1495389.
